# Supplementary material for: Paving a way to suppress hydrogen blistering by investigating the hydrogen–beryllium interaction in tungsten
Source: Royal Society of Chemistry journal article supplement (doi:10.1039/c6ra20430a), 2016-01-01
Supplement: c6ra20430a1.pdf [file c6ra20430a1.pdf]

## *Electronic Supplementary Information*

### **Paving a way to suppress hydrogen blistering by investigating the hydrogen-beryllium interaction in tungsten**

Hong-Bo Zhou<sup>\*ab</sup>, Nyachio Kennedy Momanyi<sup>a</sup>, Yu-Hao Li<sup>a</sup>, Wei Jiang<sup>b</sup> and Xiao-Chun Li<sup>c</sup>

*<sup>a</sup>Department of Physics, Beihang University, Beijing 100191, China*

*<sup>b</sup>Department of Materials Science and Engineering, University of Utah, UT 84112, USA*

*<sup>c</sup>Institute of Plasma Physics, Chinese Academy of Sciences, Hefei 230031, China*

\*Corresponding author. Email : hbzhou@buaa.edu.cn (H.-B. Zhou)

#### **This file includes:**

Fig. S1. The optimized configurations of H surrounding interstitial Be atom in W. (a) one H atom, and (b) five H atoms. The blue spheres represent the W atoms, the red spheres represent the potential Be atoms sites, and the green spheres represent the H atoms.

Fig. S2. The optimized configurations of H at the Be-vacancy complex. (a) one H atom, and (b) five H atoms. The labels are the same as in Fig. S1.

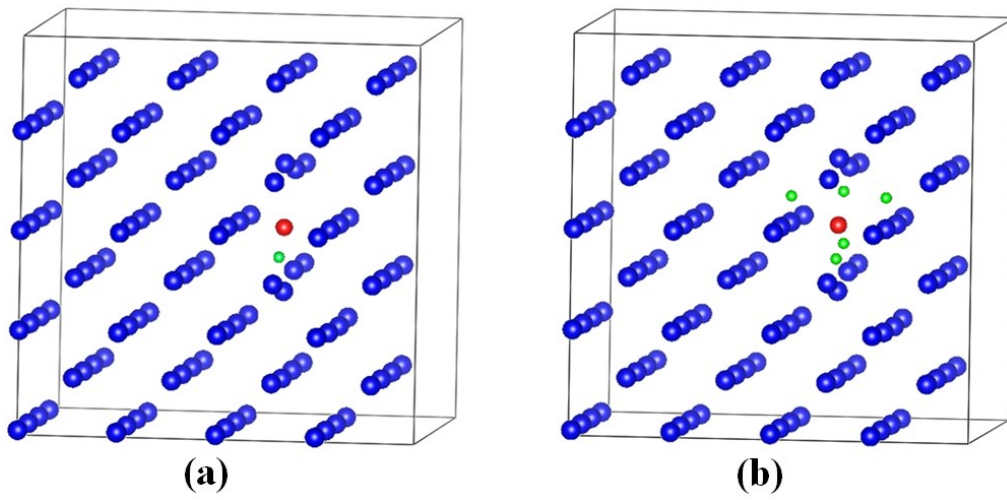

Fig. S1.

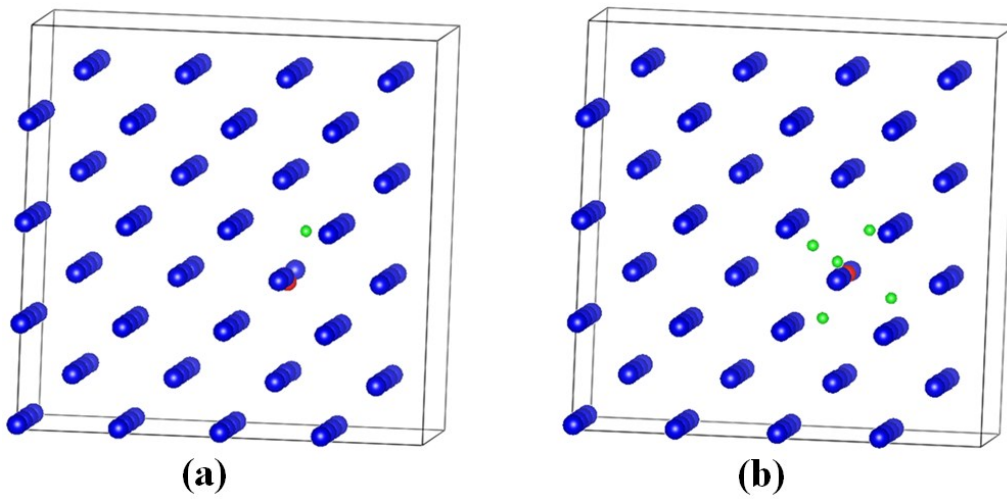

Fig. S2.
